# Supplementary material
Source: ML conference proceedings conference paper supplement (https://www.ecva.net/papers/eccv_2022/papers_ECCV/html/136820349_ECCV_2022_paper.php)
Supplement: Supplementary file 1 [file 136820349-supp.pdf]

# MotionCLIP: Exposing Human Motion Generation to CLIP Space Supplementary Materials

Guy Tevet\*, Brian Gordon\*, Amir Hertz,  
Amit H. Bermano, and Daniel Cohen-Or

Tel Aviv University, Israel  
{guytevet, briangordon}@mail.tau.ac.il

**Text-to-motion additional results.** Figure 1 illustrates a variety of sports generated by MotionCLIP, as used in the user-study. Note how even though this is not a curated list, the motion created according to all 30 depicted text prompts resembles the requested actions.

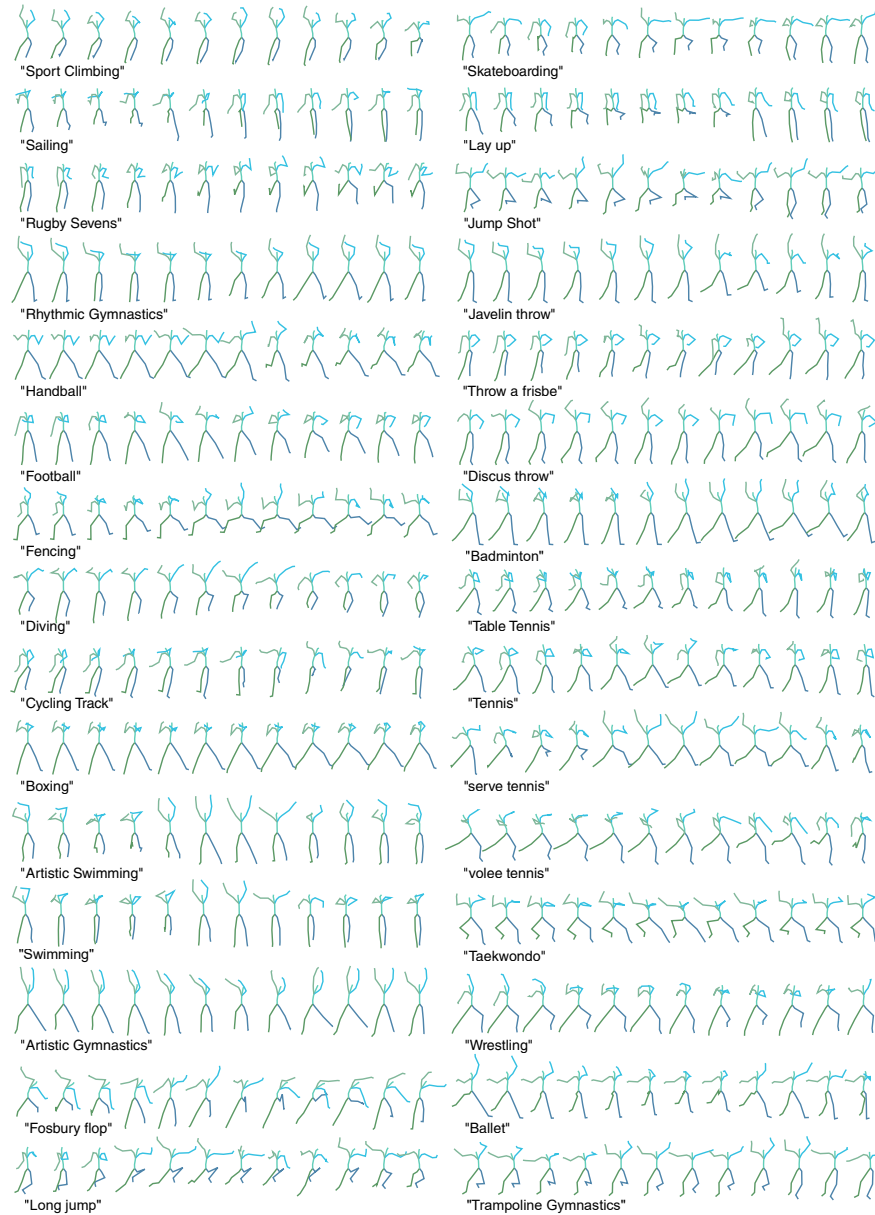

**Fig. 1.** Sport motions generated by MotionCLIP conditioned on the text beneath each row.
